# Supplementary material
Source: PubMed Central journal article supplement (PMC2652668)
Supplement: NIHMS92080-supplement-2.pdf [file NIHMS92080-supplement-2.pdf]

**Supplemental Table 1. Pairwise Haplotype Analysis for 19 SNPs for the Young Affected (YA) and Old Affected (OA).**

The bottom diagonal represents the p-values for haplotypic association for the old affected individuals (OA) while the top diagonal represents p-values for the young affected individuals (YA). Red bolded numbers represent p-values meeting Bonferroni significance for 171 observations. Blue bolded numbers represent p-values meeting Bonferroni significance for 19 SNPs. Black bolded numbers represent p-values not meeting Bonferroni significance but have a p-value <0.05.

|            | RS1862008       | RS9349373       | RS1421379       | RS1421378      | RS9381475       | RS12528807     | RS3799862       | RS3799863      | RS12195701     | RS6929105       | RS1805017       | RS1362931      | RS6899519       | RS1805018      | RS4498351      | RS2216465      | RS1051931       | RS12528857     | RS974670 |
|------------|-----------------|-----------------|-----------------|----------------|-----------------|----------------|-----------------|----------------|----------------|-----------------|-----------------|----------------|-----------------|----------------|----------------|----------------|-----------------|----------------|----------|
| RS1862008  |                 | 0.603           | 0.90709         | 0.92815        | 0.18936         | 0.98264        | 0.18642         | 0.39425        | 0.35123        | 0.38492         | <b>0.04015</b>  | 0.71319        | 0.05542         | 0.20894        | 0.91852        | 0.12975        | 0.39641         | 0.10124        | 0.75887  |
| RS9349373  | <b>0.01137</b>  |                 | 0.61263         | 0.92174        | 0.14133         | 0.99319        | 0.17328         | 0.39664        | 0.32873        | 0.36917         | <b>0.04115</b>  | 0.70441        | 0.06443         | 0.20329        | 0.9062         | 0.10899        | 0.40283         | 0.0964         | 0.76382  |
| RS1421379  | <b>0.00727</b>  | <b>0.00541</b>  |                 | 0.83685        | 0.58519         | 0.93457        | 0.18301         | 0.37323        | 0.40049        | 0.40039         | 0.07361         | 0.66743        | 0.12777         | 0.2063         | 0.85631        | 0.1646         | 0.40703         | 0.08917        | 0.7593   |
| RS1421378  | <b>0.00565</b>  | <b>0.0105</b>   | <b>0.00461</b>  |                | 0.56525         | 0.94223        | 0.11153         | 0.55343        | 0.69559        | 0.19877         | 0.11369         | 0.70399        | 0.16442         | 0.2961         | 0.9225         | 0.13229        | 0.1351          | 0.16035        | 0.73782  |
| RS9381475  | <b>0.00114</b>  | <b>0.00271</b>  | <b>0.00479</b>  | <b>0.00133</b> |                 | 0.49995        | 0.156           | 0.23563        | 0.41404        | 0.31408         | 0.12166         | 0.4366         | 0.14812         | 0.1397         | 0.73461        | 0.26479        | 0.3268          | 0.12996        | 0.63627  |
| RS12528807 | <b>0.00601</b>  | <b>0.01312</b>  | <b>0.01223</b>  | <b>0.03381</b> | <b>0.00128</b>  |                | 0.17545         | 0.39968        | 0.54866        | 0.22226         | 0.1376          | 0.7229         | 0.25784         | 0.21626        | 0.96716        | 0.24053        | 0.23231         | 0.3113         | 0.60911  |
| RS3799862  | <b>0.00013</b>  | <b>0.0003</b>   | <b>0.00022</b>  | <b>0.00075</b> | <b>4.00E-05</b> | <b>0.00082</b> |                 | 0.18487        | 0.15211        | 0.27697         | 0.05492         | 0.12601        | 0.08504         | 0.1276         | 0.16339        | 0.0852         | 0.26828         | 0.18545        | 0.10703  |
| RS3799863  | <b>0.00411</b>  | <b>0.009</b>    | <b>0.00546</b>  | <b>0.03416</b> | <b>0.00089</b>  | 0.05805        | <b>0.00273</b>  |                | 0.247          | 0.24453         | 0.05695         | 0.42321        | 0.11134         | 0.3108         | 0.33767        | 0.05024        | 0.15196         | 0.1706         | 0.21517  |
| RS12195701 | <b>0.03062</b>  | <b>0.028</b>    | <b>0.02488</b>  | <b>0.03929</b> | <b>0.00883</b>  | <b>0.04678</b> | <b>0.00054</b>  | <b>0.01604</b> |                | 0.20215         | 0.10189         | 0.46357        | 0.22899         | 0.14405        | 0.51632        | 0.1583         | 0.17987         | 0.20974        | 0.41779  |
| RS6929105  | <b>6.00E-05</b> | <b>9.00E-05</b> | <b>8.00E-05</b> | <b>0.00032</b> | <b>2.00E-05</b> | <b>0.00032</b> | <b>0.00129</b>  | <b>0.00144</b> | <b>0.00015</b> |                 | 0.064           | 0.11814        | 0.10079         | 0.16887        | 0.19854        | 0.10758        | 0.28354         | 0.2223         | 0.12469  |
| RS1805017  | <b>0.00057</b>  | <b>0.00117</b>  | <b>0.00138</b>  | <b>0.00066</b> | <b>0.00063</b>  | <b>0.00076</b> | <b>3.00E-05</b> | <b>0.00028</b> | <b>0.00081</b> | <b>2.00E-05</b> |                 | 0.09505        | 0.11858         | <b>0.03862</b> | 0.06138        | 0.19206        | 0.05839         | <b>0.03633</b> | 0.11629  |
| RS1362931  | <b>0.00082</b>  | <b>0.00175</b>  | <b>0.00114</b>  | <b>0.01995</b> | <b>0.00021</b>  | <b>0.00744</b> | <b>0.00301</b>  | <b>0.00755</b> | <b>0.0032</b>  | <b>0.00082</b>  | <b>0.0001</b>   |                | 0.17494         | 0.13167        | 0.79651        | 0.09201        | 0.1464          | 0.36023        | 0.57572  |
| RS6899519  | <b>0.00098</b>  | <b>0.00101</b>  | <b>0.00114</b>  | <b>0.00075</b> | <b>0.00095</b>  | <b>0.00156</b> | <b>6.00E-05</b> | <b>0.00055</b> | <b>0.00101</b> | <b>2.00E-05</b> | <b>0.00076</b>  | <b>0.00014</b> |                 | 0.06522        | 0.15697        | 0.21567        | 0.09571         | 0.06649        | 0.19637  |
| RS1805018  | <b>0.00112</b>  | <b>0.00247</b>  | <b>0.00154</b>  | <b>0.00257</b> | <b>0.00028</b>  | <b>0.01236</b> | <b>0.00094</b>  | 0.05802        | <b>0.00424</b> | <b>0.0009</b>   | <b>0.00012</b>  | <b>0.00152</b> | <b>0.00024</b>  |                | 0.16452        | <b>0.02498</b> | 0.10604         | 0.09328        | 0.10012  |
| RS4498351  | <b>0.00724</b>  | <b>0.01455</b>  | <b>0.00634</b>  | 0.13399        | <b>0.00169</b>  | 0.11694        | <b>0.00073</b>  | 0.41063        | <b>0.0104</b>  | <b>0.00045</b>  | <b>3.00E-05</b> | <b>0.02252</b> | <b>5.00E-05</b> | 0.08736        |                | 0.11975        | 0.11521         | 0.25637        | 0.51969  |
| RS2216465  | <b>0.00243</b>  | <b>0.0045</b>   | <b>0.00378</b>  | <b>0.01135</b> | <b>0.00151</b>  | <b>0.00654</b> | <b>0.00036</b>  | <b>0.00039</b> | <b>0.00545</b> | <b>0.00011</b>  | <b>0.00112</b>  | <b>0.00215</b> | <b>0.00054</b>  | <b>0.00039</b> | <b>0.00162</b> |                | 0.08837         | 0.12941        | 0.2215   |
| RS1051931  | <b>0.00011</b>  | <b>0.00026</b>  | <b>0.00017</b>  | <b>0.00066</b> | <b>3.00E-05</b> | <b>0.00083</b> | <b>0.00366</b>  | <b>0.00072</b> | <b>0.00046</b> | <b>0.00313</b>  | <b>2.00E-05</b> | <b>0.00834</b> | <b>4.00E-05</b> | <b>0.00092</b> | <b>0.00057</b> | <b>0.00036</b> |                 | 0.1095         | 0.06984  |
| RS12528857 | <b>0.02585</b>  | <b>0.02113</b>  | <b>0.02119</b>  | <b>0.03708</b> | <b>0.00702</b>  | <b>0.04844</b> | <b>0.00084</b>  | <b>0.01707</b> | <b>0.02388</b> | <b>0.00022</b>  | <b>0.00179</b>  | <b>0.00423</b> | <b>0.00207</b>  | <b>0.00383</b> | <b>0.01216</b> | <b>0.00649</b> | <b>0.00069</b>  |                | 0.23868  |
| RS974670   | <b>0.01797</b>  | <b>0.02998</b>  | <b>0.01543</b>  | 0.08261        | <b>0.004</b>    | 0.09079        | <b>0.00025</b>  | 0.18809        | <b>0.02346</b> | <b>0.00012</b>  | <b>0.00035</b>  | <b>0.0057</b>  | <b>0.00046</b>  | <b>0.0316</b>  | 0.15344        | <b>0.01212</b> | <b>9.00E-05</b> | <b>0.02611</b> |          |

**Supplemental Table 2. Haplotypes Constructed Using the 4 SNPs Identified through Backward Logistic Regression.**

HapScore represents the score statistic for association of traits with haplotype. A negative HapScore indicates the haplotype is more likely to be protective, while a more positive score indicates the haplotype is more likely to confer risk. P-values are listed for overall haplotypic association (global) and for each individual haplotype. Frequencies are listed separately for cases and controls.

Global P-value=0.006

|   | RS974670 | A379V | RS9381475 | RS1421378 | Hap.Score | P-value | Control Freq | Case Freq |
|---|----------|-------|-----------|-----------|-----------|---------|--------------|-----------|
| 1 | C        | G     | T         | G         | -3.31     | 0.0009  | 0.24         | 0.16      |
| 2 | C        | G     | C         | A         | -1.04     | 0.30    | 0.09         | 0.03      |
| 3 | T        | G     | T         | G         | 0.25      | 0.80    | 0.01         | 0.00      |
| 4 | C        | G     | C         | G         | 0.69      | 0.49    | 0.22         | 0.18      |
| 5 | C        | A     | C         | A         | 0.84      | 0.40    | 0.13         | 0.19      |
| 6 | T        | G     | C         | A         | 1.08      | 0.28    | 0.30         | 0.37      |
| 7 | C        | A     | C         | G         | 2.70      | 0.0070  | 0.02         | 0.06      |

**Supplemental Table 3. PLA2G7 Polymorphisms and gene expression.** PLA2G7

expression was derived from the Affymetrix HG-U95Av2 chip using tag 37068\_at. P-value for expression is adjusted for race, sex, and age.

| SNP               | P-value for expression |
|-------------------|------------------------|
| RS974670          | 0.34                   |
| RS12528857        | 0.12                   |
| RS1051931 (A379V) | 0.62                   |
| RS2216465         | 0.91                   |
| RS4498351         | 0.44                   |
| RS1805018 (I198T) | 0.07                   |
| RS6899519         | 0.85                   |
| RS1362931         | 0.80                   |
| RS1805017 (R92H)  | 0.47                   |
| RS6929105         | 0.63                   |
| RS12195701        | 0.22                   |
| RS3799863         | 0.36                   |
| RS3799862         | 0.29                   |
| RS12528807        | 0.82                   |
| RS9381475         | 0.17                   |
| RS1421378         | 0.75                   |
| RS1421379         | 0.16                   |
| RS9349373         | 0.86                   |
| RS1862008         | 0.34                   |
